# Supplementary material for: Genetic association analysis of LARS2 with type 2 diabetes
Source: Springer Nature journal article supplement (doi:10.1007/s00125-009-1557-7), 2009-10-21
Supplement: MOESM1 [file 8088786]

## Electronic supplementary material

**ESM Table 1** Overview of tagging SNPs, including results from the NL1 study

| <b>rs number</b> | <b>Position</b> | <b>Allele 1</b> | <b>Allele 2</b> | <b>MAF controls</b> | <b>MAF cases</b> | <b>OR (95% CI)</b> | <b><i>p</i> value</b> |
|------------------|-----------------|-----------------|-----------------|---------------------|------------------|--------------------|-----------------------|
| rs854191         | 45409713        | T               | C               | 0.19                | 0.16             | 0.86 (0.68–1.08)   | 0.22                  |
| rs17637580       | 45411477        | G               | A               | 0.33                | 0.35             | 1.08 (0.89–1.30)   | 0.45                  |
| rs17077759       | 45411945        | A               | C               | 0.23                | 0.20             | 0.86 (0.69–1.07)   | 0.17                  |
| rs17637703       | 45415725        | A               | G               | 0.22                | 0.25             | 1.22 (0.99–1.50)   | 0.07                  |
| rs864391         | 45422021        | G               | A               | 0.23                | 0.20             | 0.88 (0.71–1.09)   | 0.23                  |
| rs6802884        | 45423962        | T               | C               | 0.19                | 0.17             | 0.91 (0.72–1.14)   | 0.42                  |
| rs17576051       | 45424984        | A               | G               | 0.11                | 0.10             | 0.94 (0.71–1.25)   | 0.72                  |
| rs3774696        | 45425473        | A               | C               | 0.24                | 0.27             | 1.16 (0.95–1.42)   | 0.17                  |
| rs9878643        | 45426336        | G               | A               | NA                  | NA               | NA                 | NA                    |
| rs6764923        | 45429693        | A               | G               | 0.40                | 0.37             | 0.88 (0.69–1.13)   | 0.32                  |
| rs17576289       | 45433737        | A               | G               | 0.14                | 0.12             | 0.87 (0.67–1.12)   | 0.29                  |
| rs4682783        | 45445335        | A               | G               | NA                  | NA               | NA                 | NA                    |
| rs4683113        | 45450337        | A               | G               | 0.42                | 0.42             | 1.00 (0.80–1.25)   | 1.00                  |
| rs9825692        | 45451366        | G               | A               | 0.28                | 0.31             | 1.17 (0.97–1.42)   | 0.12                  |
| rs952621         | 45451698        | C               | T               | 0.18                | 0.20             | 1.13 (0.89–1.43)   | 0.33                  |

| rs number  | Position | Allele 1 | Allele 2 | MAF controls | MAF cases | OR (95% CI)      | p value |
|------------|----------|----------|----------|--------------|-----------|------------------|---------|
| rs11926964 | 45464453 | A        | T        | 0.18         | 0.16      | 0.89 (0.70–1.13) | 0.34    |
| rs1877960  | 45471148 | T        | C        | 0.29         | 0.28      | 0.95 (0.73–1.24) | 0.74    |
| rs1949304  | 45475954 | T        | C        | 0.28         | 0.28      | 0.97 (0.74–1.26) | 0.84    |
| rs3774694  | 45481450 | C        | T        | 0.31         | 0.32      | 1.02 (0.84–1.23) | 0.89    |
| rs12487705 | 45492763 | A        | G        | 0.36         | 0.38      | 1.12 (0.93–1.34) | 0.26    |
| rs2128358  | 45524032 | A        | G        | 0.13         | 0.13      | 1.04 (0.80–1.34) | 0.79    |
| rs11706785 | 45546084 | A        | G        | 0.43         | 0.42      | 0.95 (0.75–1.19) | 0.64    |
| rs2118749  | 45547261 | C        | T        | 0.28         | 0.30      | 1.09 (0.84–1.42) | 0.54    |
| rs9825041  | 45502488 | G        | A        | 0.06         | 0.07      | 1.35 (0.92–1.98) | 0.15    |

The *LARS2* locus was also investigated using a tagging SNP approach in the NL1 sample

Common SNPs (MAF >0.05) in *LARS2* were identified using HAPMAP (gene boundaries set at 45,405,079–45,565,332) [19]

Tagging SNPs were selected using the Tagger option in Haploview (NCBI build 36, phase II, April 2007,

Centre d'Etude du Polymorphisme [Utah residents with northern and western European ancestry] population [CEU])

LOD (logarithm of odds) threshold 3.0 and  $r^2 > 0.8$ ) [20]

Allele 1 is the major and allele 2 is the minor allele

NA, not available
