# Supplementary material for: Genetic association analysis of LARS2 with type 2 diabetes
Source: Springer Nature journal article supplement (doi:10.1007/s00125-009-1557-7), 2009-10-21

## Electronic supplementary material

**ESM Fig. 2** Geographic stratification in the UK for the H324Q (rs71645922) variant. The values (%) represent minor allele frequencies of the H324Q (rs71645922) variant in each of the geographic regions

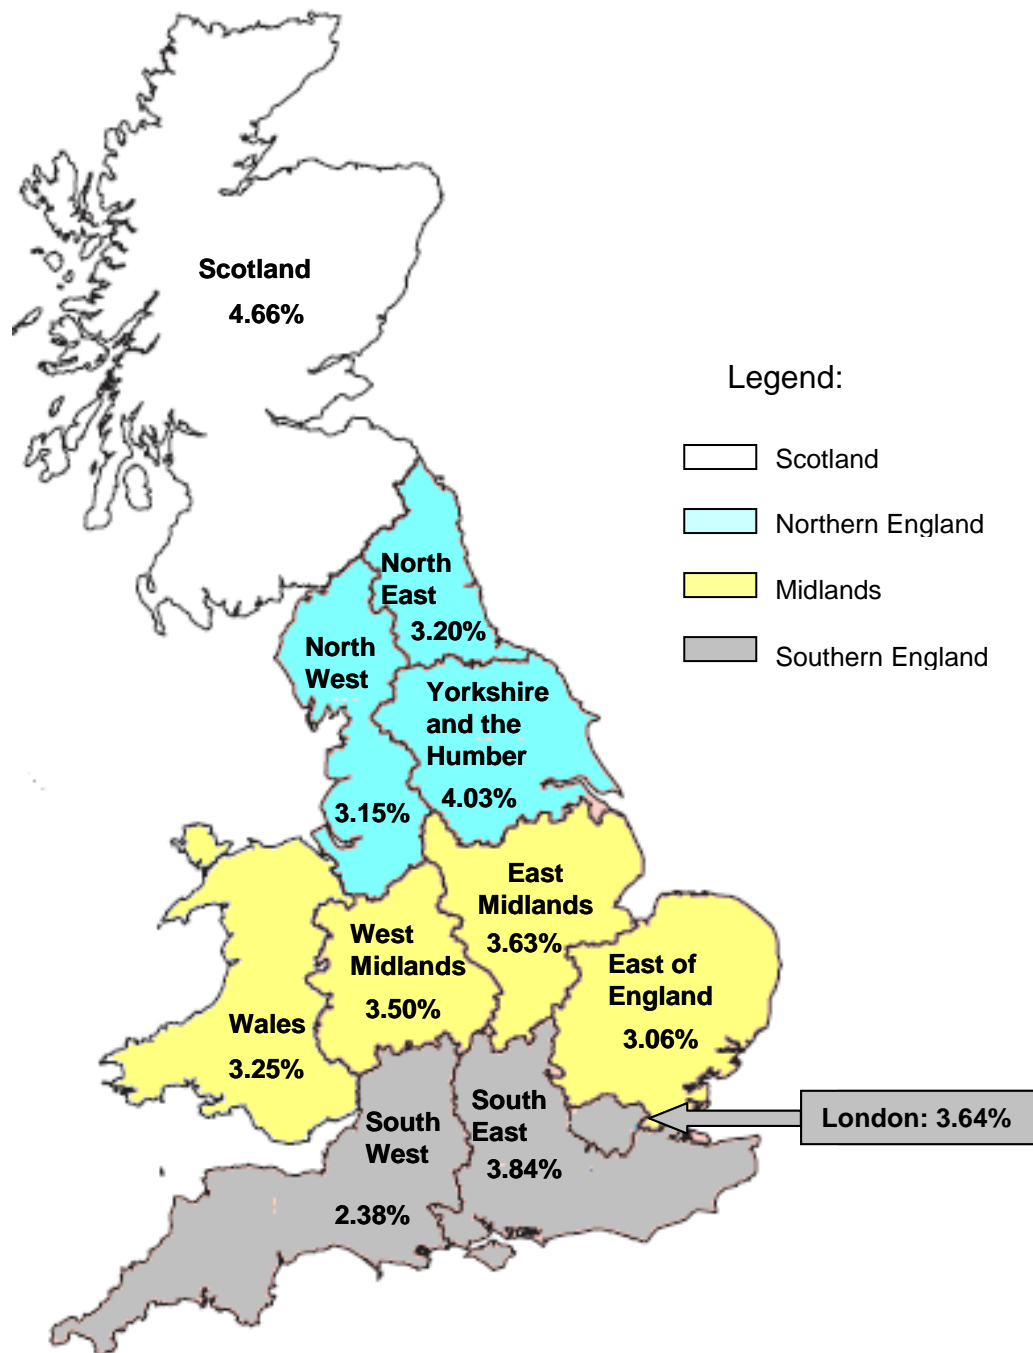

Supplement: MOESM3 [file 8088786]
