# Supplementary material for: Genetic association analysis of LARS2 with type 2 diabetes
Source: Springer Nature journal article supplement (doi:10.1007/s00125-009-1557-7), 2009-10-21

## Electronic supplementary material

**ESM Fig. 3** Geographic stratification in other European samples. The numbers in the circles represent minor allele frequencies (%) of the H324Q (rs71645922) variant in each of the study samples

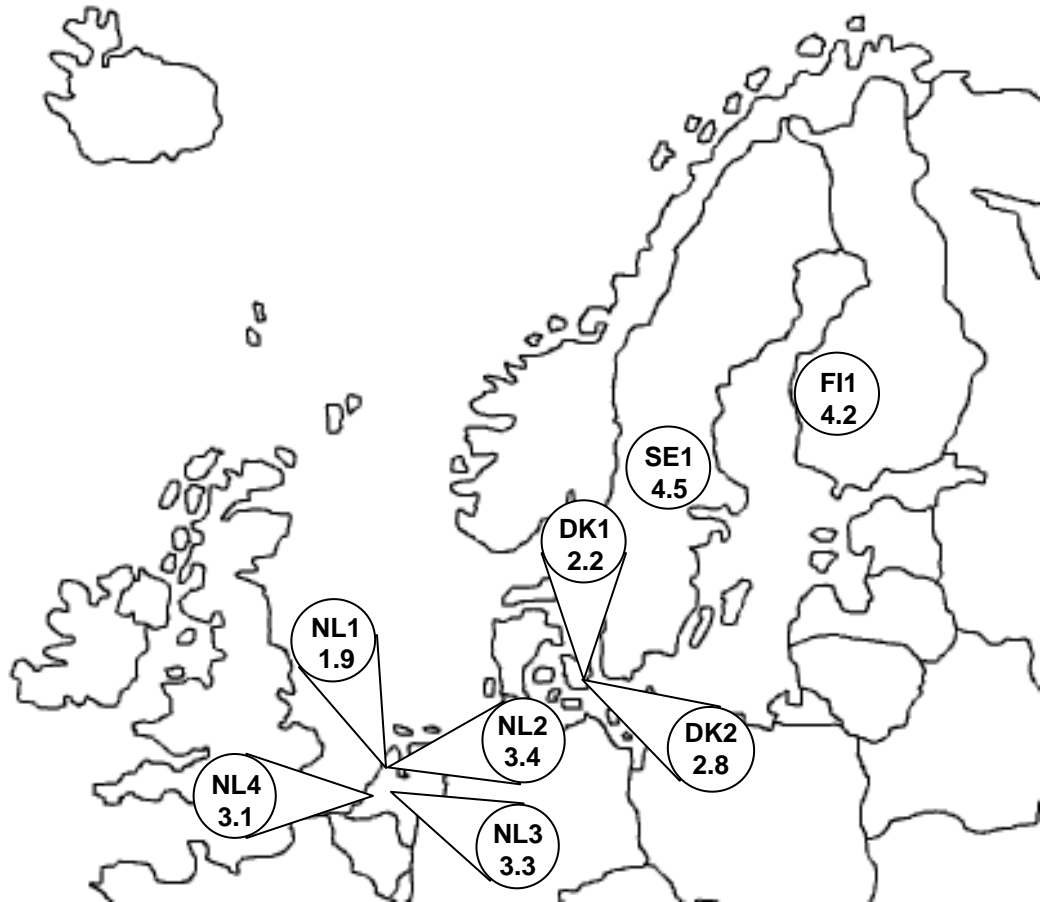

Supplement: MOESM4 [file 8088786]
